# Supplementary material
Source: PubMed Central journal article supplement (PMC503713)
Supplement: pnas_101_30_10872__1.pdf [file pnas_101_30_10872__1.pdf]

Added  
Template

none

T<sub>1</sub>

T<sub>2</sub>

T<sub>3</sub>

T<sub>4</sub>

T<sub>5</sub>

T<sub>6</sub>

T<sub>7</sub>

T<sub>8</sub>

T<sub>9</sub>

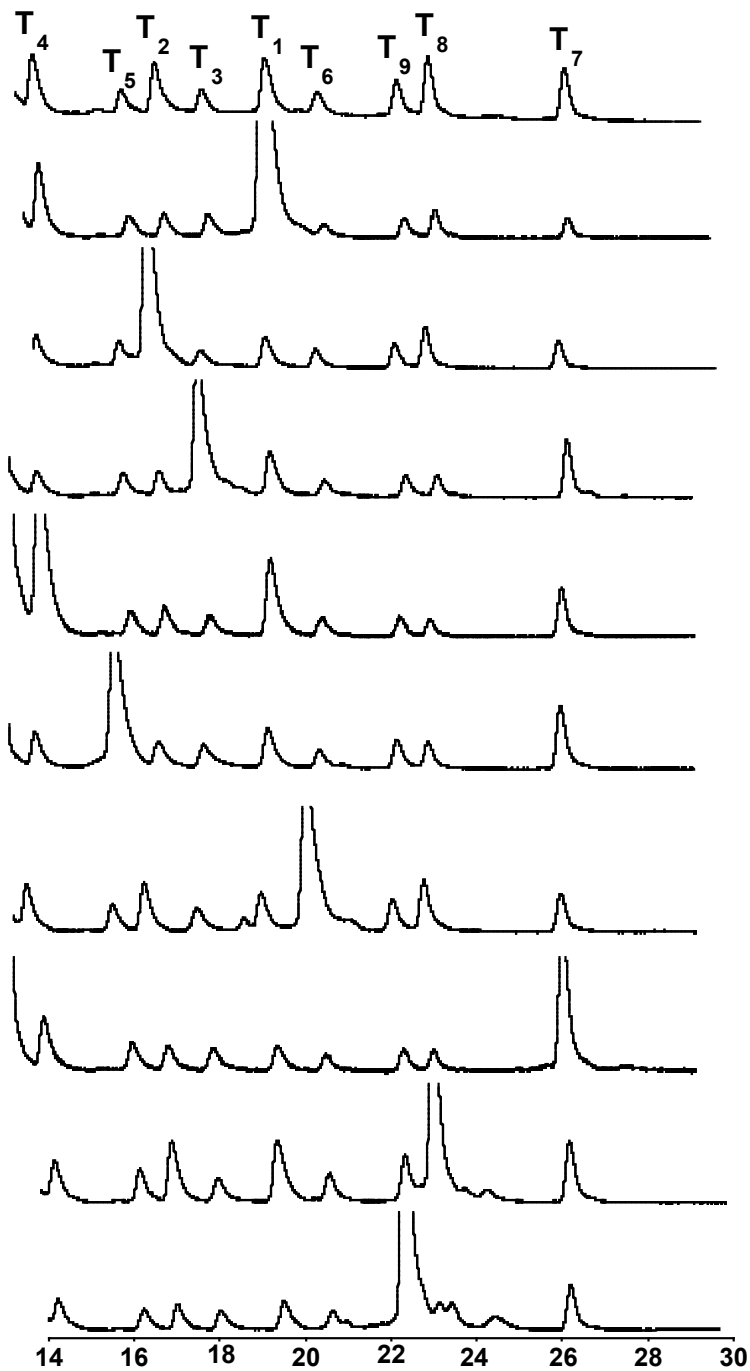

Retention time (min)
