# Supplementary material
Source: PubMed Central journal article supplement (PMC503713)

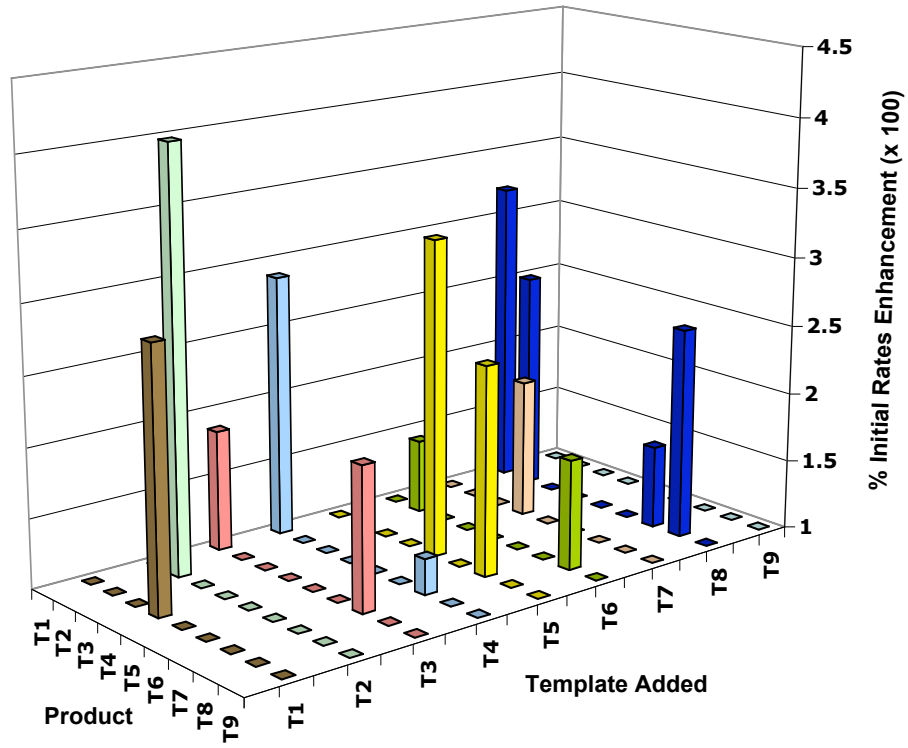

Supplement: pnas_101_30_10872__2.pdf [file pnas_101_30_10872__2.pdf]

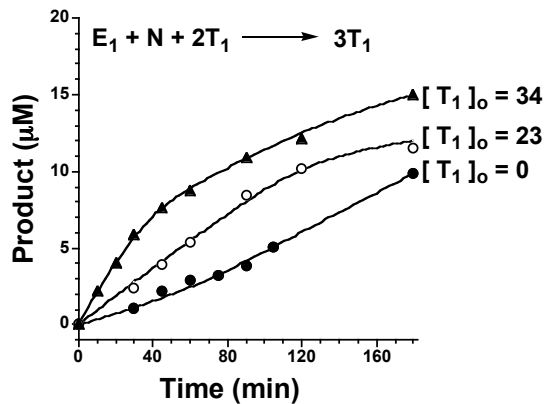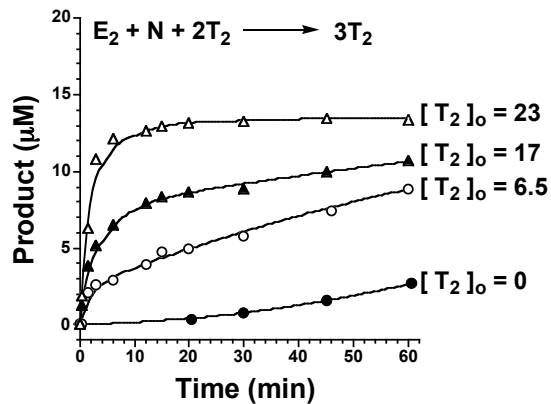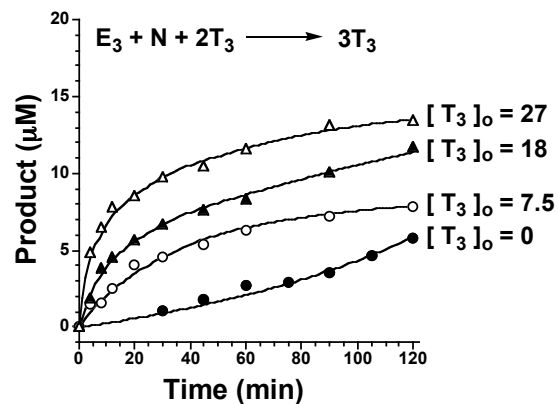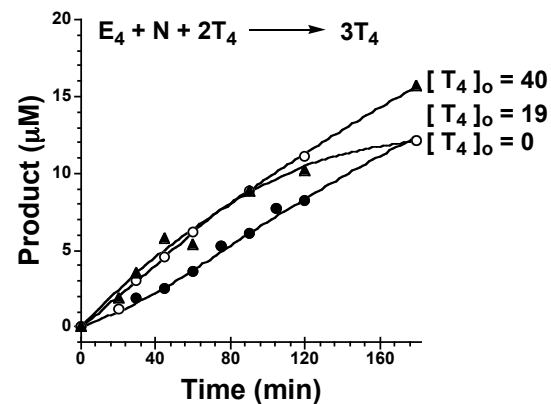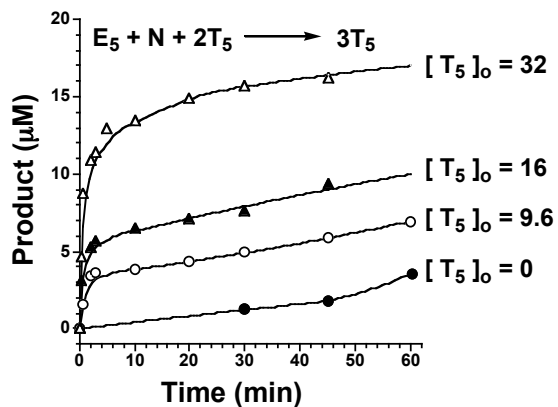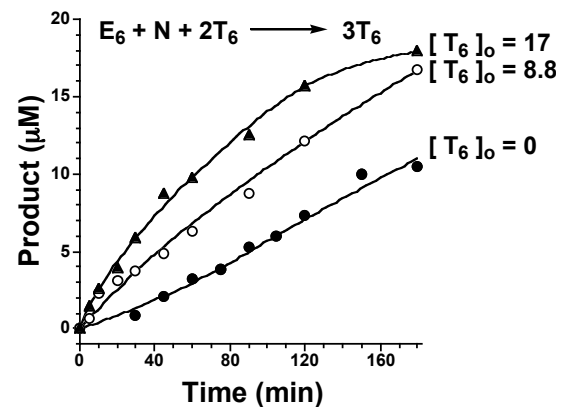

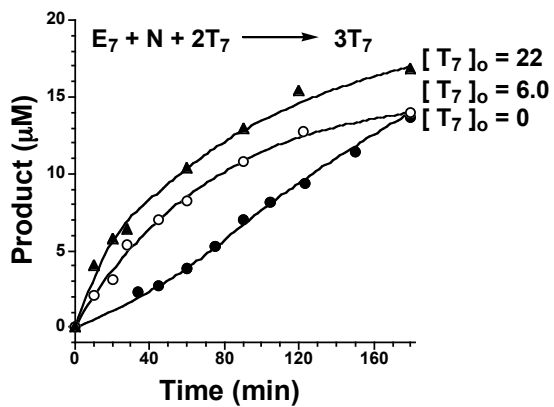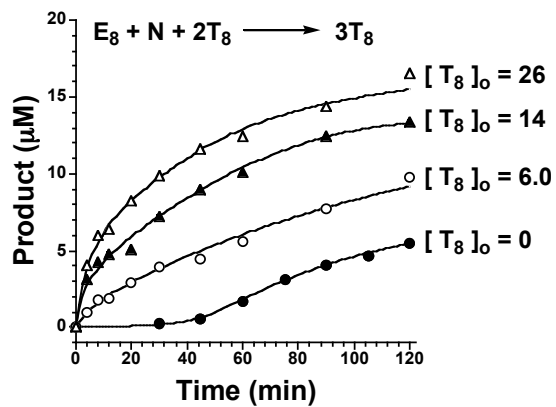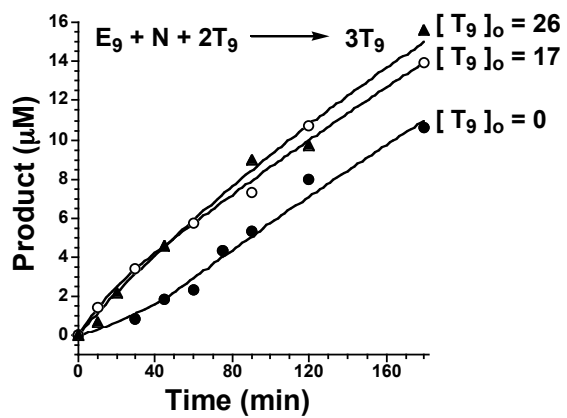

Supplement: pnas_101_30_10872__3.pdf [file pnas_101_30_10872__3.pdf]

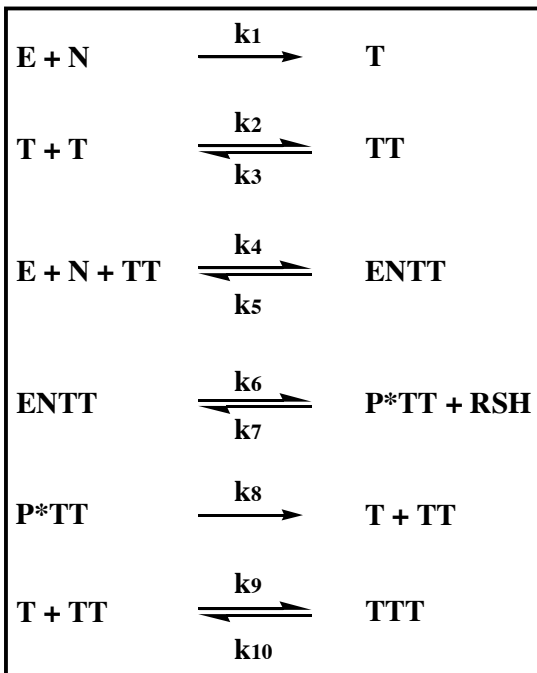

Supplement: pnas_101_30_10872__4.pdf [file pnas_101_30_10872__4.pdf]
